# Supplementary material for: Central metabolism is a key player in E. coli biofilm stimulation by sub-MIC antibiotics
Source: PLoS Genet. 2023 Nov 2;19(11):e1011013. doi: 10.1371/journal.pgen.1011013 (PMC10645362; doi:10.1371/journal.pgen.1011013)
Supplement: S6 Dataset — (XLSX) [file pgen.1011013.s015.xlsx]

## Sheet: Rep#1
	1	2	3	4	5	6	7	8	9	10	11	12				1	2	3	4	5	6	7	8	9	10	11	12
A	0.038	0.044	0.042	0.042	0.041	0.041	0.04	0.042	0.044	0.045	0.045	0.04	Read 1:600		A	-0.00208333	0.00391667	0.00191667	0.00191667	0.000916667	0.000916667	-8.33333e-05	0.00191667	0.00391667	0.00491667	0.00491667	-8.33333e-05
B	0.04	0.038	0.04	0.098	0.042	0.041	0.041	0.042	0.044	0.044	0.043	0.043	Read 1:600		B	-8.33333e-05	-0.00208333	-8.33333e-05	0.0579167	0.00191667	0.000916667	0.000916667	0.00191667	0.00391667	0.00391667	0.00291667	0.00291667
C	0.04	0.051	0.701	0.802	0.397	0.28	0.041	0.042	0.302	0.835	0.241	0.252	Read 1:600		C	-8.33333e-05	0.0109167	0.660917	0.761917	0.356917	0.239917	0.000916667	0.00191667	0.261917	0.794917	0.200917	0.211917
D	0.148	0.423	1.07	1.063	0.814	0.848	0.123	0.503	1.214	1.164	0.963	0.743	Read 1:600		D	0.107917	0.382917	1.02992	1.02292	0.773917	0.807917	0.0829167	0.462917	1.17392	1.12392	0.922917	0.702917
E	0.343	0.451	1.073	1.093	0.935	0.968	0.585	0.603	1.165	1.198	1.069	0.831	Read 1:600		E	0.302917	0.410917	1.03292	1.05292	0.894917	0.927917	0.544917	0.562917	1.12492	1.15792	1.02892	0.790917
F	0.73	0.845	0.993	1.054	0.99	0.997	0.919	0.915	1.132	1.143	1.117	0.971	Read 1:600		F	0.689917	0.804917	0.952917	1.01392	0.949917	0.956917	0.878917	0.874917	1.09192	1.10292	1.07692	0.930917
G	0.749	0.96	0.929	1.007	1.077	1.043	1.083	1.081	1.127	1.175	1.115	1.006	Read 1:600		G	0.708917	0.919917	0.888917	0.966917	1.03692	1.00292	1.04292	1.04092	1.08692	1.13492	1.07492	0.965917
H	0.039	0.044	0.04	0.04	0.039	0.04	0.04	0.04	0.04	0.04	0.04	0.039	Read 1:600	0.0400833
	1	2	3	4	5	6	7	8	9	10	11	12				1	2	3	4	5	6	7	8	9	10	11	12
A	2356	2399	2342	2390	2470	2519	2396	2483	2408	2406	2440	2527	Read 2:488,530		A	79.25	122.25	65.25	113.25	193.25	242.25	119.25	206.25	131.25	129.25	163.25	250.25
B	2375	2518	2506	2676	2506	2469	2430	2562	2536	2465	2582	2479	Read 2:488,530		B	98.25	241.25	229.25	399.25	229.25	192.25	153.25	285.25	259.25	188.25	305.25	202.25
C	2474	2547	5345	5303	4395	4230	2556	2578	7852	20838	27191	30622	Read 2:488,530		C	197.25	270.25	3068.25	3026.25	2118.25	1953.25	279.25	301.25	5575.25	18561.2	24914.2	28345.2
D	3833	4945	5720	5917	6148	6179	6474	25861	17887	16893	78445	66558	Read 2:488,530		D	1556.25	2668.25	3443.25	3640.25	3871.25	3902.25	4197.25	23584.2	15610.2	14616.2	76168.2	64281.2
E	5078	5164	5553	5631	6057	6111	44495	42356	51758	49868	83010	69072	Read 2:488,530		E	2801.25	2887.25	3276.25	3354.25	3780.25	3834.25	42218.2	40079.2	49481.2	47591.2	80733.2	66795.2
F	5092	5271	5484	5689	6148	6114	74269	70450	65994	62736	77578	68416	Read 2:488,530		F	2815.25	2994.25	3207.25	3412.25	3871.25	3837.25	71992.2	68173.2	63717.2	60459.2	75301.2	66139.2
G	4901	5075	5402	5597	5910	5868	75716	63447	71899	72127	62100	58852	Read 2:488,530		G	2624.25	2798.25	3125.25	3320.25	3633.25	3591.25	73439.2	61170.2	69622.2	69850.2	59823.2	56575.2
H	2226	2330	2265	2265	2288	2291	2337	2300	2309	2269	2268	2173	Read 2:488,530	2276.75
																1	2	3	4	5	6	7	8	9	10	11	12
															A	-38040	31212.8	34043.5	59087	210818	264273	-1.431e+06	107609	33510.6	26288.1	33203.4	-3.003e+06
															B	-1.179e+06	-115800	-2.751e+06	6893.53	119609	209727	167182	148826	66191.5	48063.8	104657	69342.9
															C	-2.367e+06	24755.7	4642.42	3971.89	5934.86	8141.37	304636	157174	21286.4	23349.9	124003	133757
															D	14420.8	6968.23	3343.23	3558.7	5002.15	4830.02	50620.1	50947.1	13297.6	13004.7	82529.9	91449.3
															E	9247.59	7026.36	3171.84	3185.67	4224.14	4132.11	77476.5	71199.3	43986.6	41100.8	78464.3	84453
															F	4080.57	3719.95	3365.72	3365.41	4075.36	4010.01	81910.2	77919.7	58353.6	54817.6	69923	71047.4
															G	3701.78	3041.85	3515.8	3433.85	3503.9	3580.81	70417.2	58765.8	64054.8	61546.6	55653.8	58571.6
															H
																1	2	3	4	5	6	7	8	9	10	11	12
															A	1	1	1	1	1	1	37.6183	3.44759	0.984348	0.444906	0.157498	-11.3633
															B	1	1	1	1	1	1	-0.1418	-1.2852	-0.0240609	6.97232	0.874996	0.330633
															C	1	1	1	1	1	1	-0.128701	6.34899	4.58519	5.87879	20.894	16.4293
															D	1	1	1	1	1	1	3.5102	7.31134	3.97746	3.65436	16.4989	18.9335
															E	1	1	1	1	1	1	8.37802	10.1332	13.8678	12.9017	18.5752	20.4382
															F	1	1	1	1	1	1	20.0733	20.9464	17.3376	16.2885	17.1575	17.7175
															G	1	1	1	1	1	1	19.0225	19.3191	18.2191	17.9235	15.8834	16.3571

## Sheet: Rep#2
	1	2	3	4	5	6	7	8	9	10	11	12
A	0.039	0.041	0.043	0.06	0.041	0.041	0.041	0.041	0.295	0.142	0.042	0.04	Read 1:600		-0.000333333	0.00166667	0.00366667	0.0206667	0.00166667	0.00166667	0.00166667	0.00166667	0.255667	0.102667	0.00266667	0.000666667		-799500	170700	81136.4	14588.7	193500	191700	165900	189900	1769.88	3277.6	111187	471750
B	0.055	0.363	0.871	1.061	0.041	0.045	0.573	0.436	0.939	0.878	0.042	0.043	Read 1:600		0.0156667	0.323667	0.831667	1.02167	0.00166667	0.00566667	0.533667	0.396667	0.899667	0.838667	0.00266667	0.00366667		18414.9	1360.97	595.792	552.529	184500	52500	11676.8	10599.6	998.703	726.749	112312	81954.5
C	0.206	0.267	1.321	1.262	0.102	0.172	0.307	0.639	1.331	1.27	0.061	0.257	Read 1:600		0.166667	0.227667	1.28167	1.22267	0.0626667	0.132667	0.267667	0.599667	1.29167	1.23067	0.0216667	0.217667		1983	1614.2	310.923	369.275	4970.74	2302.76	8213.57	9284.32	1858.45	1824.62	15530.8	3484.69
D	0.274	0.365	1.262	1.263	0.538	0.976	0.263	0.296	1.3	1.303	0.884	0.746	Read 1:600		0.234667	0.325667	1.22267	1.22367	0.498667	0.936667	0.223667	0.256667	1.26067	1.26367	0.844667	0.706667		1514.91	1162.23	339.831	369.79	831.217	678.47	11452.3	10256.5	5613.3	5692.56	16798.9	18181.8
E	0.582	0.736	1.24	1.225	1.03	1.03	0.604	1.028	1.267	1.252	1.083	1.03	Read 1:600		0.542667	0.696667	1.20067	1.18567	0.990667	0.990667	0.564667	0.988667	1.22767	1.21267	1.04367	0.990667		876.229	702.632	397.696	457.548	648.553	657.638	13447.8	8322.83	7936.6	8202.17	15678.9	16479.3
F	0.917	1.101	1.221	1.179	1.078	1.115	1.165	1.134	1.225	1.25	1.174	1.207	Read 1:600		0.877667	1.06167	1.18167	1.13967	1.03867	1.07567	1.12567	1.09467	1.18567	1.21067	1.13467	1.16767		477.972	418.681	420.169	471.629	584.884	601.023	11089.9	8368.3	8933.79	8579.98	13369.1	13685
G	0.912	1.133	1.205	1.163	1.156	1.154	1.125	1.209	1.273	1.246	1.261	1.243	Read 1:600		0.872667	1.09367	1.16567	1.12367	1.11667	1.11467	1.08567	1.16967	1.23367	1.20667	1.22167	1.20367		440.604	384.486	420.789	450.756	523.433	565.64	8750.84	9100.46	10096.3	8800.69	8875.17	9010.38
H	0.039	0.04	0.039	0.04	0.04	0.039	0.039	0.04	0.039	0.039	0.039	0.039	Read 1:600	0.0393333
	1	2	3	4	5	6	7	8	9	10	11	12
A	531	549	562	566	587	584	541	581	717	601	561	579	Read 2:488,530		266.5	284.5	297.5	301.5	322.5	319.5	276.5	316.5	452.5	336.5	296.5	314.5		1	1	1	1	1	1	-0.207505	1.11248	0.0218137	0.224667	0.574612	2.46088
B	553	705	760	829	572	562	6496	4469	1163	874	564	565	Read 2:488,530		288.5	440.5	495.5	564.5	307.5	297.5	6231.5	4204.5	898.5	609.5	299.5	300.5		1	1	1	1	1	1	0.634094	7.78826	1.67626	1.31531	0.60874	1.56104
C	595	632	663	716	576	570	2463	5832	2665	2510	601	1023	Read 2:488,530		330.5	367.5	398.5	451.5	311.5	305.5	2198.5	5567.5	2400.5	2245.5	336.5	758.5		1	1	1	1	1	1	4.14199	5.75165	5.9772	4.94109	3.12444	1.51326
D	620	643	680	717	679	900	2826	2897	7341	7458	14454	13113	Read 2:488,530		355.5	378.5	415.5	452.5	414.5	635.5	2561.5	2632.5	7076.5	7193.5	14189.5	12848.5		1	1	1	1	1	1	7.55971	8.82483	16.5179	15.394	20.2101	26.7983
E	740	754	742	807	907	916	7858	8493	10008	10211	16628	16590	Read 2:488,530		475.5	489.5	477.5	542.5	642.5	651.5	7593.5	8228.5	9743.5	9946.5	16363.5	16325.5		1	1	1	1	1	1	15.3473	11.8452	19.9565	17.9263	24.1751	25.0583
F	684	709	761	802	872	911	12748	9425	10857	10652	15434	16244	Read 2:488,530		419.5	444.5	496.5	537.5	607.5	646.5	12483.5	9160.5	10592.5	10387.5	15169.5	15979.5		1	1	1	1	1	1	23.2019	19.9873	21.2624	18.1922	22.8577	22.7695
G	649	685	755	771	849	895	9765	10909	12720	10884	11107	11110	Read 2:488,530		384.5	420.5	490.5	506.5	584.5	630.5	9500.5	10644.5	12455.5	10619.5	10842.5	10845.5		1	1	1	1	1	1	19.861	23.6691	23.9938	19.5243	16.9557	15.9295
H	257	267	270	259	280	272	269	271	258	258	264	249	Read 2:488,530	264.5

## Sheet: Rep#3
	1	2	3	4	5	6	7	8	9	10	11	12
A	0.039	0.04	0.043	0.043	0.04	0.041	0.04	0.041	0.042	0.043	0.041	0.042	Read 1:600		-8.33333e-05	0.000916667	0.00391667	0.00391667	0.000916667	0.00191667	0.000916667	0.00191667	0.00291667	0.00391667	0.00191667	0.00291667		1	1	1	1	1	1	-0.614151	0.340338	2.21141	1.22972	0.189055	0.0258577
B	0.04	0.043	0.13	0.173	0.064	0.054	0.04	0.04	0.044	0.108	0.044	0.043	Read 1:600		0.000916667	0.00391667	0.0909167	0.133917	0.0249167	0.0149167	0.000916667	0.000916667	0.00491667	0.0689167	0.00491667	0.00391667		1	1	1	1	1	1	2.14165	4.62451	-1.30421	-0.350254	-2.3336	1.13054
C	0.044	0.04	0.83	0.67	0.462	0.106	0.04	0.041	0.243	0.682	0.121	0.188	Read 1:600		0.00491667	0.000916667	0.790917	0.630917	0.422917	0.0669167	0.000916667	0.00191667	0.203917	0.642917	0.0819167	0.148917		1	1	1	1	1	1	-6.80374	0.501187	7.1582	7.21329	74.4398	-355.375
D	0.447	0.376	1.103	1.068	0.702	0.691	0.244	0.475	1.194	1.194	0.863	0.601	Read 1:600		0.407917	0.336917	1.06392	1.02892	0.662917	0.651917	0.204917	0.435917	1.15492	1.15492	0.823917	0.561917		1	1	1	1	1	1	10.9022	13.5194	6.36304	5.96906	26.6095	32.7354
E	0.583	0.834	1.152	1.084	0.882	0.953	0.794	0.636	1.179	1.18	1.056	0.997	Read 1:600		0.543917	0.794917	1.11292	1.04492	0.842917	0.913917	0.754917	0.596917	1.13992	1.14092	1.01692	0.957917		1	1	1	1	1	1	11.7546	16.6248	16.5409	14.9398	20.0309	21.4587
F	0.969	1.067	1.117	1.102	0.947	0.969	1.01	1.091	1.15	1.171	1.144	1.113	Read 1:600		0.929917	1.02792	1.07792	1.06292	0.907917	0.929917	0.970917	1.05192	1.11092	1.13192	1.10492	1.07392		1	1	1	1	1	1	23.6006	20.5711	17.9561	18.1947	20.2264	20.0357
G	0.875	1.036	1.128	1.083	1.11	1.138	1.07	1.108	1.191	1.172	1.203	1.197	Read 1:600		0.835917	0.996917	1.08892	1.04392	1.07092	1.09892	1.03092	1.06892	1.15192	1.13292	1.16392	1.15792		1	1	1	1	1	1	18.9641	20.8448	20.7402	17.9889	20.1139	19.7499
H	0.039	0.04	0.039	0.039	0.039	0.039	0.039	0.039	0.038	0.04	0.039	0.039	Read 1:600	0.0390833
	1	2	3	4	5	6	7	8	9	10	11	12
A	2387	2343	2274	2314	2331	2344	2281	2361	2189	2293	2376	2403	Read 2:488,530		-18.4167	-62.4167	-131.417	-91.4167	-74.4167	-61.4167	-124.417	-44.4167	-216.417	-112.417	-29.4167	-2.41667		221000	-68090.9	-33553.2	-23340.4	-81181.8	-32043.5	-135727	-23173.9	-74200	-28702.1	-15347.8	-828.571
B	2366	2454	2624	2613	2339	2276	2321	2458	2390	2368	2436	2367	Read 2:488,530		-39.4167	48.5833	218.583	207.583	-66.4167	-129.417	-84.4167	52.5833	-15.4167	-37.4167	30.5833	-38.4167		-43000	12404.3	2404.22	1550.09	-2665.55	-8675.98	-92090.9	57363.6	-3135.59	-542.926	6220.34	-9808.51
C	2375	2468	5517	4464	2932	2378	2444	2471	8148	17537	9998	24088	Read 2:488,530		-30.4167	62.5833	3111.58	2058.58	526.583	-27.4167	38.5833	65.5833	5742.58	15131.6	7592.58	21682.6		-6186.44	68272.7	3934.15	3262.85	1245.12	-409.714	42090.9	34217.4	28161.4	23535.8	92686.7	145602
D	4794	4541	5679	5634	4604	4641	15487	39761	25017	24037	75117	65485	Read 2:488,530		2388.58	2135.58	3273.58	3228.58	2198.58	2235.58	13081.6	37355.6	22611.6	21631.6	72711.6	63079.6		5855.57	6338.61	3076.92	3137.85	3316.53	3429.25	63838.6	85694.3	19578.5	18730	88251.1	112258
E	5462	5482	5647	5809	5817	5971	52272	40813	57325	57926	84849	82602	Read 2:488,530		3056.58	3076.58	3241.58	3403.58	3411.58	3565.58	49866.6	38407.6	54919.6	55520.6	82443.6	80196.6		5619.58	3870.32	2912.69	3257.28	4047.36	3901.43	66055.7	64343.3	48178.6	48663.1	81072.1	83719.8
F	5710	5602	5731	5626	5827	5907	83834	69698	63948	64807	86628	83426	Read 2:488,530		3304.58	3196.58	3325.58	3220.58	3421.58	3501.58	81428.6	67292.6	61542.6	62401.6	84222.6	81020.6		3553.63	3109.77	3085.2	3029.95	3768.61	3765.48	83867.7	63971.4	55398	55129.1	76225.3	75444
G	5305	5474	5720	5790	5687	5818	70221	70989	75128	68481	74143	73422	Read 2:488,530		2899.58	3068.58	3314.58	3384.58	3281.58	3412.58	67815.6	68583.6	72722.6	66075.6	71737.6	71016.6		3468.75	3078.07	3043.93	3242.2	3064.28	3105.41	65781.8	64161.8	63131.8	58323.4	61634.6	61331.3
H	2341	2465	2399	2430	2399	2355	2444	2515	2380	2380	2434	2323	Read 2:488,530	2405.42
