# Supplementary material for: Central metabolism is a key player in E. coli biofilm stimulation by sub-MIC antibiotics
Source: PLoS Genet. 2023 Nov 2;19(11):e1011013. doi: 10.1371/journal.pgen.1011013 (PMC10645362; doi:10.1371/journal.pgen.1011013)
Supplement: S10 Dataset — (XLSX) [file pgen.1011013.s019.xlsx]

## Sheet: Sheet1
Growth		WT							Growth		narG
		50:50			50mM KNO3						50:50			50mM KNO3
		1	2	3	4	5	6				1	2	3	4	5	6
	A	0.0425	0.042	0.0443	0.0433	0.0434	0.0431			A	0.1334	0.2317	0.1904	0.0426	0.0422	0.0416
	B	0.1384	0.2564	0.191	0.1524	0.0965	0.2398			B	0.5155	0.5141	0.4835	0.4705	0.4704	0.4753
	C	0.3372	0.3239	0.3178	0.3292	0.3508	0.3493			C	0.413	0.4274	0.4308	0.3475	0.3487	0.351
	D	0.4194	0.3934	0.407	0.4977	0.5021	0.4778			D	0.6184	0.6169	0.5983	0.4894	0.4977	0.4942
	E	0.5165	0.4811	0.4826	0.3306	0.3925	0.3438			E	0.6195	0.5294	0.5844	0.6306	0.6303	0.6548
	F	0.5011	0.4515	0.478	0.3236	0.3271	0.354			F	0.611	0.6233	0.5333	0.657	0.6931	0.6412
	G	0.4048	0.5444	0.4919	0.3751	0.3231	0.3785			G	0.6068	0.5987	0.6504	0.6305	0.6805	0.6512
	H	0.0428	0.0403	0.0402	0.0421	0.0418	0.0461			H	0.0426	0.0414	0.0422	0.042	0.0418	0.0414
	DMSO	0.480367	DMSO-Ster	0.438539	0.3589	DMSO-Ster	0.317073			DMSO	0.618633	DMSO-Ster	0.576979	0.654067	DMSO-Ster	0.612412
	Sterility	0.0418273								Sterility	0.0416545
Growth % of Control		0.153402	0.0393869	0.563855	0.464476	0.496015	0.401399		Growth % of Control		15.901	32.938	25.7801	0.154382	0.0890666	-0.00890666
		22.0214	48.929	34.0158	34.873	17.243	62.4376				82.1253	81.8826	76.5792	70.0256	70.0093	70.8094
		67.3538	64.321	62.93	90.6331	97.4454	96.9723				64.3603	66.8561	67.4454	49.9411	50.1371	50.5126
		86.0978	80.169	83.2702	143.775	145.163	137.499				99.9596	99.6996	96.4759	73.1118	74.4671	73.8956
		108.239	100.167	100.509	91.0746	110.597	95.2377				100.15	84.5344	94.0668	96.1682	96.1192	100.12
		104.728	93.4175	99.4603	88.8669	89.9708	98.4546				98.677	100.809	85.2103	100.479	106.374	97.899
		82.7686	114.602	102.63	105.109	88.7092	106.182				97.9491	96.5452	105.506	96.1518	104.316	99.5319
		1	2	3	4	5	6				1	2	3	4	5	6
Biofilm	A	0.053	0.0544	0.0525	0.0575	0.0535	0.0547		Biofilm	A	0.3089	0.3373	0.2999	0.056	0.055	0.0543
	B	0.0739	0.1788	0.2662	0.1095	0.0578	0.1823			B	0.3299	0.354	0.3574	0.3848	0.3924	0.3721
	C	0.1951	0.204	0.2224	0.0869	0.0865	0.0893			C	0.3584	0.3565	0.3611	0.4114	0.5061	0.5316
	D	0.2547	0.4401	0.3018	0.1265	0.1295	0.1136			D	0.1877	0.1661	0.1794	0.2836	0.3096	0.2501
	E	0.0956	0.1182	0.1195	0.1107	0.1046	0.0885			E	0.1605	0.2034	0.2103	0.1723	0.2122	0.1381
	F	0.0975	0.1164	0.1303	0.1101	0.1036	0.0954			F	0.1306	0.1503	0.1843	0.1989	0.2053	0.1599
	G	0.1008	0.1046	0.1096	0.0989	0.1127	0.1006			G	0.1335	0.1417	0.1733	0.171	0.1608	0.138
	H	0.0535	0.0529	0.0525	0.0544	0.0548	0.0556			H	0.0528	0.0522	0.0538	0.0519	0.0531	0.0538
	DMSO	0.105	DMSO-Ster	0.0509182	0.104067	DMSO-Ster	0.0499848			DMSO	0.1495	DMSO-Ster	0.0957	0.1566	DMSO-Ster	0.1028
	Sterility	0.0540818								Sterility	0.0538
Biofilm % of Control		-2.12462	0.624888	-3.10659	6.83844	-1.16399	1.23674		Biofilm % of Control		266.562	296.238	257.158	2.14008	1.16732	0.486381
		38.9216	244.938	416.586	110.87	7.43862	256.514				288.506	313.689	317.241	321.984	329.377	309.63
		276.951	294.43	330.566	65.6563	64.856	70.4577				318.286	316.301	321.108	347.86	439.981	464.786
		394.001	758.115	486.502	144.88	150.882	119.072				139.916	117.346	131.243	223.541	248.833	190.953
		81.539	125.924	128.477	113.271	101.067	68.8572				111.494	156.322	163.532	115.272	154.086	82.0039
		85.2705	122.389	149.688	112.07	99.0664	82.6614				80.2508	100.836	136.364	141.148	147.374	103.21
		91.7515	99.2144	109.034	89.6635	117.272	93.0646				83.2811	91.8495	124.869	114.008	104.086	81.9066
