# Supplementary material for: Central metabolism is a key player in E. coli biofilm stimulation by sub-MIC antibiotics
Source: PLoS Genet. 2023 Nov 2;19(11):e1011013. doi: 10.1371/journal.pgen.1011013 (PMC10645362; doi:10.1371/journal.pgen.1011013)
Supplement: S16 Dataset — (XLSX) [file pgen.1011013.s025.xlsx]

## Sheet: GENT
	Growth				Biofilm									Biofilm
	0.0435	0.0433	0.1121		0.0522	0.0532	0.0524
	0.0464	0.0464	0.0439		0.0503	0.0505	0.0498
	0.1776	0.4122	0.3224		0.0497	0.0673	0.06
	0.5285	0.5296	0.5199		0.0635	0.0705	0.0709
	0.7017	0.6494	0.6196		0.0757	0.0764	0.073
	0.7377	0.6646	0.6249		0.0756	0.0755	0.076
	0.7584	0.6995	0.6481		0.0653	0.0703	0.07
	0.0435	0.0418	0.0421		0.0546	0.0512	0.0516
	DMSO Ave	0.702			DMSO Ave	0.0685333
Ster Ave	0.0430667			Ster Ave	0.0519083
	0.0657628	0.0354108	10.4765		1.75439	7.76942	2.95739
	0.505868	0.505868	0.126467		-9.67419	-8.47118	-12.6817
	20.4168	56.0198	42.3917		-13.2832	92.5815	48.6717
	73.6696	73.8365	72.3644		69.7243	111.83	114.236
	99.9545	92.0174	87.4949		143.108	147.318	126.867
	105.418	94.3242	88.2993		142.506	141.905	144.912
	108.559	99.6206	91.8201		80.5514	110.627	108.822

## Sheet: STREP
	Growth				Biofilm
	0.0422	0.0428	0.041		0.0513	0.0489	0.0516
	0.0541	0.1767	0.0427		0.053	0.0599	0.0512
	0.1349	0.1319	0.0982		0.0586	0.0539	0.0512
	0.4827	0.4175	0.3609		0.0666	0.0584	0.0717
	0.6326	0.5638	0.4836		0.0679	0.069	0.0703
	0.5757	0.6402	0.5367		0.064	0.0673	0.0688
	0.6127	0.6323	0.6393		0.0672	0.0676	0.0669
	0.0412	0.043	0.0423		0.0506	0.0494	0.0497
	DMSO Ave	0.6281			DMSO Ave	0.0672333
Ster Ave	0.0432083			Ster Ave	0.0506083
	-0.172397	-0.0698135	-0.377563		4.1604	-10.2757	5.96491
	1.86217	22.8233	-0.0869107		14.386	55.8897	3.5589
	15.6767	15.1638	9.40203		48.0702	19.7995	3.5589
	75.1407	63.9933	54.3163		96.1905	46.8672	126.867
	100.769	89.0065	75.2946		104.01	110.627	118.446
	91.0411	102.069	84.3732		80.5514	100.401	109.424
	97.367	100.718	101.915		99.7995	102.206	97.995

## Sheet: AMI
	Growth				Biofilm
	0.0416	0.0815	0.0407		0.0499	0.0579	0.0515
	0.1348	0.043	0.0442		0.0583	0.0543	0.0545
	0.1316	0.1907	0.2737		0.0589	0.078	0.1066
	0.3541	0.3698	0.381		0.0696	0.0829	0.0761
	0.4792	0.4832	0.5534		0.0873	0.0789	0.0727
	0.5157	0.5187	0.4868		0.0851	0.0818	0.0909
	0.5019	0.3981	0.4016		0.0843	0.0941	0.1068
	0.0442	0.042	0.0411		0.0515	0.0503	0.0501
	DMSO Ave	0.433867			DMSO Ave	0.0950667
Ster Ave	0.042525			Ster Ave	0.0510583
	-0.236366	9.95933	-0.466344		-2.63208	15.5463	1.0036
	23.5791	0.121377	0.428015		16.4552	7.36603	7.82049
	22.7614	37.8633	59.0724		17.8186	61.2195	126.207
	79.6171	83.629	86.4909		42.1322	72.3537	56.9021
	111.584	112.606	130.544		82.3518	63.2645	49.1763
	120.911	121.678	113.526		77.3528	69.8542	90.5321
	117.385	90.8605	91.7549		75.5349	97.8034	126.662
